# Supplementary material
Source: publisher figshare collection journal article supplement (https://tandf.figshare.com/ndownloader/files/10218489)
Supplement: Supplementary file 1 [file 10218489]

1  
2  
3  
4  
5  
6  
7  
8  
9  
10  
11  
12  
13  
14  
15  
16  
17  
18  
19  
20  
21  
22  
23  
24  
25  
26  
27  
28  
29  
30  
31  
32  
33  
34  
35  
36  
37  
38  
39  
40  
41  
42  
43  
44  
45  
46  
47  
48  
49  
50  
51  
52  
53  
54  
55  
56  
57  
58  
59  
60

**Supple table** Data for serum CYFRA21-1 in 119 individuals that were excluded (ng/ml)

|                     | Median | Range      |
|---------------------|--------|------------|
| Lower outlier group | 0.72   | 0.38-0.80  |
| Upper outlier group | 8.32   | 7.40-13.96 |

For Peer Review Only
